# Supplementary material
Source: Research Square preprint supplement (doi:10.21203/rs.3.rs-9059468/v1)
Supplement: Supplementary file 1 [file 95e0c5800e88d5af4905f2ab.docx]

**Highlights**

- This study pioneered research on the combination of tea polyphenols—a multidimensional bioactive macromolecular polymer—with gluten protein, employing a green gluten washing method to obtain tea polyphenol-enriched gluten protein.
- This study investigated the in vitro hypoglycemic properties, digestibility, and digestive fluid antioxidant capacity of gluten protein, revealing that the theabrownin complex significantly enhances multiple biochemical functions of gluten protein.
- This study explored the effects of varying theabrownin ratios on intramolecular and intermolecular binding forms of gluten protein, revealing the correlation between the multidimensional molecular structure of gluten protein and its biological functions.
